# Supplementary material
Source: PubMed Central journal article supplement (PMC1635437)
Supplement: bj4000001add1.pdf [file bj4000001add1.pdf]

**Supplementary Table. Computational approach to determining disulfide connectivity of cycloviolacin O14<sup>a</sup>**

| set | Disulfide connectivity | DYANA target function <sup>b</sup> (Å <sup>2</sup> ) |
|-----|------------------------|------------------------------------------------------|
| 1   | I-II III-IV V-VI       | 7.85                                                 |
| 2   | I-II III-V IV-VI       | 6.80                                                 |
| 3   | I-II III-VI IV-V       | 10.38                                                |
| 4   | I-III II-IV V-VI       | 8.60                                                 |
| 5   | I-III II-V IV-VI       | 5.96                                                 |
| 6   | I-III II-VI IV-V       | 10.04                                                |
| 7   | I-IV II-III V-VI       | 5.65                                                 |
| 8   | I-IV II-V III-VI       | 4.90 <sup>c</sup>                                    |
| 9   | I-IV II-VI III-V       | 5.11                                                 |
| 10  | I-V II-III IV-VI       | 10.88                                                |
| 11  | I-V II-IV III-VI       | 14.09                                                |
| 12  | I-V II-VI III-IV       | 10.70                                                |
| 13  | I-VI II-III IV-V       | 8.77                                                 |
| 14  | I-VI II-IV III-V       | 5.71                                                 |
| 15  | I-VI II-V III-IV       | 5.32                                                 |

<sup>a</sup> Structures were calculated with each of the 15 alternative disulfide connectivities (sets 1-15) and the DYANA target functions were evaluated

<sup>b</sup> Smaller numbers represent better fits amongst the ensemble of structures generated

<sup>c</sup> Set 8 corresponds to the disulfide connectivity best fitting the restraint data and is the same connectivity determined experimentally for kalata B1 [38]
