# Supplementary material
Source: PubMed Central journal article supplement (PMC1635437)
Supplement: bj4000001add2.pdf [file bj4000001add2.pdf]

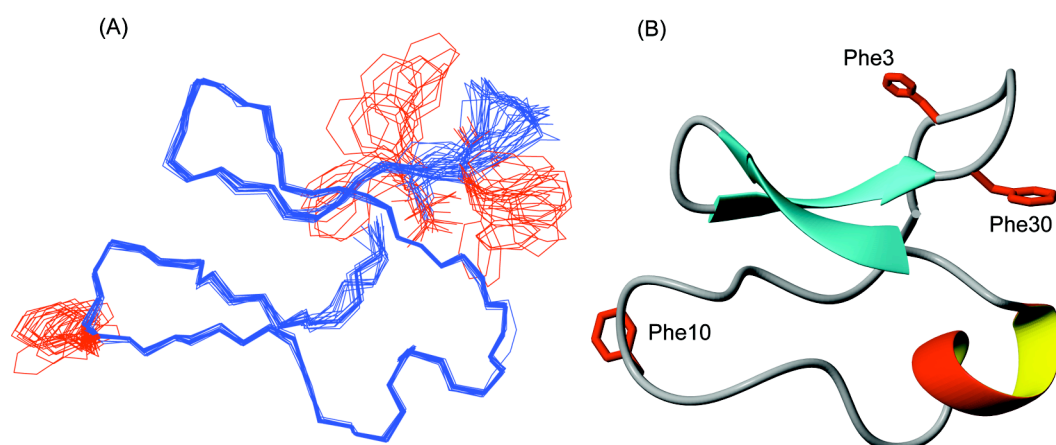

**Supplementary Figure. Structural representations of modeled cycloviolacin O25.** (A) 20 lowest energy structures of cycloviolacin O25 superimposed over the backbone atoms (N, C, C $\alpha$ ). The backbone is in blue with the Phe residues in red. (B) Ribbon representation of the mean structure of modeled cycloviolacin O25. Phe residues are labeled.
